# Supplementary material
Source: ML conference proceedings conference paper supplement (https://proceedings.mlr.press/v80/jin18b.html)
Supplement: Supplementary file [file jin18b-supp.pdf]

---

# Supplement of “Network Global Testing by Counting Graphlets”

---

Jiashun Jin<sup>1</sup> Zheng Tracy Ke<sup>2</sup> Shengming Luo<sup>1</sup>

## Abstract

This is the supplementary material of (Jin et al., 2018). It contains Proposition A.1 and the proofs of Theorems 3.2-3.3, Corollary 3.1, and secondary lemmas.

## A. An Alternative Expression of the GC Test Statistics

We rewrite the test statistic  $\widehat{\chi}_{gc}$  (as well as  $\widehat{L}_2$ ,  $\widehat{L}_3$  and  $\widehat{C}_4$ ) explicitly as a function of the adjacency matrix  $A$ . The following proposition is proved in Section D.4.

**Proposition A.1** *The following are true:*

$$\widehat{L}_2 = \frac{1}{6\binom{n}{3}} [1'A^2\mathbf{1} - \text{tr}(A^2)],$$

$$\widehat{L}_3 = \frac{1}{24\binom{n}{4}} [1'A^3\mathbf{1} - 2(1'A^2\mathbf{1}) + 1'A\mathbf{1} - \text{tr}(A^3)],$$

and

$$\widehat{C}_4 = \frac{1}{24\binom{n}{4}} [\text{tr}(A^4) - 2(1'A^2\mathbf{1}) + 1'A\mathbf{1}].$$

Furthermore,

$$\widehat{\chi}_{gc} = \frac{[\text{tr}(A^4) - 2(1'A^2\mathbf{1}) + 1'A\mathbf{1}]}{n(n-1)(n-2)(n-3)} - \frac{1}{(n-3)^4} \left[ \frac{1'A^3\mathbf{1} - 2(1'A^2\mathbf{1}) + 1'A\mathbf{1} - \text{tr}(A^3)}{1'A^2\mathbf{1} - \text{tr}(A^2)} \right]^4.$$

## B. Proof of Theorem 3.2

We prove the case  $m = 4$ . The case of  $m = 3$  is similar and thus omitted. From now on, we omit the superscripts “(4)”

---

<sup>\*</sup>Equal contribution <sup>1</sup>Department of Statistics and Data Science, Carnegie Mellon University, Pittsburgh, USA <sup>2</sup>Department of Statistics, University of Chicago, Chicago, USA. Correspondence to: Jiashun Jin <jjashun@stat.cmu.edu>.

in all related quantities (e.g., we write  $\delta_{gc}^{(4)}$  as  $\delta_{gc}$ ). Write

$$\frac{\sqrt{3\binom{n}{4}}}{\sqrt{\widehat{C}_4}} (\widehat{\chi}_{gc} - \chi_{gc}) = \sqrt{\frac{C_4}{\widehat{C}_4}} \cdot (I + II) \quad (1)$$

where

$$I = \frac{\sqrt{3\binom{n}{4}}}{\sqrt{C_4}} (\widehat{C}_4 - C_4), \quad II = -\frac{\sqrt{3\binom{n}{4}}}{\sqrt{C_4}} \left[ \left( \frac{\widehat{L}_3}{\widehat{L}_2} \right)^4 - \left( \frac{L_3}{L_2} \right)^4 \right].$$

Using the Slutsky’s theorem, it suffices to show that

$$\widehat{C}_4/C_4 \xrightarrow{P} 1, \quad (2)$$

$$I \xrightarrow{d} N(0, 1), \quad (3)$$

and

$$II \xrightarrow{P} 0, \quad (4)$$

The following lemma is useful, and its proof can be found in Section D.

**Lemma B.1** *Under the assumptions of Theorem 3.2,*

$$C_4 \asymp n^{-4} \|\theta\|^8, \quad L_2 \asymp n^{-3} \|\theta\|_1^2 \|\theta\|^2, \\ L_3 \asymp n^{-4} \|\theta\|_1^2 \|\theta\|^4.$$

Moreover,

$$\text{Var}(\widehat{C}_4) \leq Cn^{-8} \|\theta\|^8, \quad \text{Var}(\widehat{L}_2) \leq Cn^{-6} \|\theta\|_1^3 \|\theta\|_3^3, \\ \text{Var}(\widehat{L}_3) \leq Cn^{-8} \|\theta\|_1^4 \|\theta\|_3^6.$$

We now show (2)-(4). The proof of (3) is relatively long, so we prove it in the end.

First, we prove (2). Recall that  $C_4 = E[\widehat{C}_4]$ . By Lemma B.1,

$$\mathbb{E}[(\widehat{C}_4/C_4 - 1)^2] = C_4^{-2} \text{Var}(\widehat{C}_4) = O(\|\theta\|^{-8}),$$

where the right hand side  $\rightarrow 0$  as  $\|\theta\| \rightarrow \infty$ . The claim follows by elementary probability theory.

Second, we prove (4). Define  $\widehat{L}_2^* = (\|\theta\|^2/n)\widehat{L}_2$  and  $L_2^* = (\|\theta\|^2/n)L_2$ . Using Lemma B.1, it follows from direct calculations that

$$L_3/L_2^* = O(1). \quad (5)$$

With these notations, we have

$$\begin{aligned} |II| &= \frac{\sqrt{3\binom{n}{4}}}{\sqrt{C_4}} \cdot \frac{\|\theta\|^8}{n^4} \left| \left( \frac{\widehat{L}_3}{\widehat{L}_2^*} \right)^4 - \left( \frac{L_3}{L_2^*} \right)^4 \right| \\ &\leq C\|\theta\|^4 \left| \left( \frac{\widehat{L}_3}{\widehat{L}_2^*} \right)^4 - \left( \frac{L_3}{L_2^*} \right)^4 \right|, \end{aligned}$$

where we have used  $C_4 \asymp n^{-4}\|\theta\|^8$  in the second equality; see Lemma B.1. Note that for any  $(x, y)$ ,  $|x^4 - y^4| = |(x - y)(x^3 + x^2y + xy^3 + y^3)| \leq 3|x - y| \cdot (|x| + |y|)^3$ . It follows that

$$|II| \leq C \cdot \|\theta\|^4 |Z| \cdot \left( \frac{L_3}{L_2^*} + |Z| \right)^3,$$

where for short we write

$$Z = \frac{\widehat{L}_3}{\widehat{L}_2^*} - \frac{L_3}{L_2^*}.$$

Recall that  $L_3/L_2^*$  is bounded. Therefore, to show (4), it suffices to show

$$\|\theta\|^4 \left( \frac{\widehat{L}_3}{\widehat{L}_2^*} - \frac{L_3}{L_2^*} \right) \xrightarrow{p} 0. \quad (6)$$

Below, we show (6). Write the term on the left by

$$\frac{\|\theta\|^4}{L_2^*} (\widehat{L}_3 - L_3) + \|\theta\|^4 \frac{\widehat{L}_3}{\widehat{L}_2^* L_2^*} (L_2^* - \widehat{L}_2^*) \equiv II_a + II_b.$$

To show (6), it suffices to show

$$II_a \xrightarrow{p} 0. \quad (7)$$

and

$$II_b \xrightarrow{p} 0. \quad (8)$$

Consider (7). Note that  $L_3 = E[\widehat{L}_3]$ . It follows from Lemma B.1 that

$$\begin{aligned} \text{Var}(II_a) &= \frac{\|\theta\|^8 \text{Var}(\widehat{L}_3)}{(L_2^*)^2} \leq C \frac{\|\theta\|^8 \cdot n^{-8} \|\theta\|_1^4 \|\theta\|_3^6}{(n^{-4} \|\theta\|_1^2 \|\theta\|^4)^2} \\ &\leq C \|\theta\|_3^6, \end{aligned}$$

where the last term  $\rightarrow 0$  for  $\|\theta\|_3 \rightarrow 0$  as  $n \rightarrow \infty$ ; this is due to equation (7) of (Jin et al., 2018). By elementary probability, (7) follows.

Consider (8). To show the claim, we first show

$$\widehat{L}_2/L_2 \xrightarrow{p} 1, \quad \widehat{L}_3/L_3 \xrightarrow{p} 1; \quad (9)$$

as the proofs are similar, we only show the first one. By Lemma B.1,  $\text{Var}(\widehat{L}_2) = O(n^{-6} \|\theta\|_1^3 \|\theta\|_3^3)$  and  $L_2 \asymp n^{-3} \|\theta\|_1^2 \|\theta\|^2$ . Using  $E[\widehat{L}_2] = L_2$ ,  $\mathbb{E}[(\widehat{L}_2/L_2 - 1)^2] =$

$L_2^{-2} \text{Var}(\widehat{L}_2) \leq C(\|\theta\|_3^3 / (\|\theta\|_1 \|\theta\|^4))$ , which  $\leq C/\|\theta\|^2$  since  $\|\theta\|_3^3 \leq \|\theta\|_1 \|\theta\|^2$ . This shows (9).

Using (9) and recalling  $L_3/L_2^* \leq C$  (see (5)), to show (8), it is sufficient to show

$$\|\theta\|^4 \frac{1}{(L_2^*)} (\widehat{L}_2^* - L_2^*) \xrightarrow{p} 0,$$

and since  $\widehat{L}_2^*/L_2^* = \widehat{L}_2/L_2$ , it is equivalent to show

$$\|\theta\|^4 \left( \frac{\widehat{L}_2}{L_2} - 1 \right) \xrightarrow{p} 0. \quad (10)$$

Last, we prove (3). We need some notations. Given 4 distinct nodes, there are 3 different possible cycles, denoted as  $CC(i_1, i_2, i_3, i_4) = \{(i_1, i_2, i_3, i_4), (i_1, i_2, i_4, i_3), (i_1, i_3, i_2, i_4)\}$ ; moreover, for  $B \subset \{1, 2, \dots, n\}^4$ , let  $CC(B) = \cup_{(i_1, i_2, i_3, i_4) \in B} CC(i_1, i_2, i_3, i_4)$ . For  $1 \leq m \leq n$ , let  $I_m$  be the collection of  $(i_1, i_2, i_3, i_4)$  such that  $1 \leq i_1 < i_2 < i_3 < i_4 = m$ . Write  $\Omega_{ij}^* = \Omega_{ij}(1 - \Omega_{ij})$ . Let  $W = A - \Omega$ . Define

$$S_{n,n} \equiv \frac{\sum_{CC(I_n)} W_{i_1 i_2} W_{i_2 i_3} W_{i_3 i_4} W_{i_4 i_1}}{\sqrt{\sum_{CC(I_n)} \Omega_{i_1 i_2}^* \Omega_{i_2 i_3}^* \Omega_{i_3 i_4}^* \Omega_{i_4 i_1}^*}}.$$

The following lemma is proved in Section D.

**Lemma B.2** *Under the conditions of Theorem 3.2,*

$$\frac{\sqrt{3\binom{n}{4}}}{\sqrt{C_4}} (\widehat{C}_4 - C_4) - S_{n,n} \xrightarrow{p} 0.$$

By Lemma B.2, to show (3), it suffices to show that

$$S_{n,n} \xrightarrow{d} N(0, 1). \quad (11)$$

Below, we prove (11). For  $1 \leq m \leq n$ , define the  $\sigma$ -algebra  $\mathcal{F}_{n,m} = \sigma(\{A_{ij}\}_{1 \leq i < j \leq m})$  and

$$X_{n,m} = S_{n,m} - S_{n,m-1},$$

where  $S_{n,0} = 0$  and

$$S_{n,m} = \frac{\sum_{CC(I_m)} W_{i_1 i_2} W_{i_2 i_3} W_{i_3 i_4} W_{i_4 i_1}}{\sqrt{\sum_{CC(I_m)} \Omega_{i_1 i_2}^* \Omega_{i_2 i_3}^* \Omega_{i_3 i_4}^* \Omega_{i_4 i_1}^*}}, \quad 1 \leq m \leq n.$$

It is easy to see that  $\mathbb{E}[S_{n,m} | \mathcal{F}_{n,m-1}] = S_{n,m-1}$ . Hence,  $\{X_{n,m}\}_{m=1}^n$  is a martingale difference sequence relative to the filtration  $\{\mathcal{F}_{n,m}\}_{m=1}^n$ , and  $S_{n,n} = \sum_{m=1}^n X_{n,m}$ . To show (11), we apply the martingale central limit theorem in (Hall & Heyde, 2014) and check:

$$(a) \sum_{m=1}^n \mathbb{E}(X_{n,m}^2 | \mathcal{F}_{n,m-1}) \xrightarrow{p} 1.$$

(b)  $\sum_{m=1}^n \mathbb{E}(X_{n,m}^2 1_{\{|X_{n,m}| > \epsilon\}} | \mathcal{F}_{n,m-1}) \xrightarrow{P} 0$ , for any  $\epsilon > 0$ .

Note that once we have checked that both conditions (a) and (b) are satisfied, then by the martingale central limit theorem,  $S_{n,n} \xrightarrow{d} N(0, 1)$ . Combining it with Lemma B.2, we have proved (3).

It remains to check (a)-(b). For preparation, we first derive an alternative expression of  $\mathbb{E}(X_{n,m} | \mathcal{F}_{n,m-1})$  as (14) below. By definition,

$$X_{n,m} = \frac{1}{\sqrt{M_n}} \sum_{\sum_{CC(I_m) \setminus CC(I_{m-1})} W_{i_1 i_2} W_{i_2 i_3} W_{i_3 i_4} W_{i_4 i_1}},$$

where  $M_n \equiv \sum_{CC(I_n)} \Omega_{i_1 i_2}^* \Omega_{i_2 i_3}^* \Omega_{i_3 i_4}^* \Omega_{i_4 i_1}^*$  and the summation is over all 4-cycles in  $CC(I_m) \setminus CC(I_{m-1})$ . Note that a cycle in  $CC(I_m) \setminus CC(I_{m-1})$  has to include the node  $m$ . Hence, we can use the following way to get all such cycles: First, select 2 indices  $(i, j)$  from  $\{1, 2, \dots, m-1\}$  and use them as the two neighboring nodes of  $m$ ; second, select an index  $k \in \{1, 2, \dots, m-1\} \setminus \{i, j\}$  as the last node in the cycle. This allows us to write

$$X_{n,m} = \frac{1}{\sqrt{M_n}} \sum_{1 \leq i < j \leq m-1} W_{mi} W_{mj} \cdot Y_{(m-1)ij}, \quad (12)$$

where

$$Y_{(m-1)ij} = \sum_{1 \leq k \leq m-1, k \notin \{i, j\}} W_{ki} W_{kj}. \quad (13)$$

Conditioning on  $\mathcal{F}_{n,m-1}$ ,  $\{W_{mi} W_{mj}\}_{1 \leq i < j \leq m-1}$  are mutually uncorrelated and  $Y_{(m-1)ij}$  is a constant. Hence, it follows from (12)-(13) that

$$\mathbb{E}(X_{n,m}^2 | \mathcal{F}_{n,m-1}) = \frac{1}{M_n} \sum_{1 \leq i < j \leq m-1} Y_{(m-1)ij}^2 \Omega_{mi}^* \Omega_{mj}^*. \quad (14)$$

We now check (a). It suffices to show that

$$\mathbb{E} \left[ \sum_{m=1}^n \mathbb{E}(X_{n,m}^2 | \mathcal{F}_{n,m-1}) \right] = 1, \quad (15)$$

and

$$\text{Var} \left( \sum_{m=1}^n \mathbb{E}(X_{n,m}^2 | \mathcal{F}_{n,m-1}) \right) \rightarrow 0. \quad (16)$$

Consider (15). In the definition (13), the terms in the sum are (unconditionally) mutually uncorrelated. As a result,

$$\mathbb{E}[Y_{(m-1)ij}^2] = \sum_{k < m, k \notin \{i, j\}} \Omega_{ki}^* \Omega_{kj}^*.$$

It follows that

$$\begin{aligned} & \mathbb{E} \left[ \sum_{m=1}^n \mathbb{E}(X_{n,m}^2 | \mathcal{F}_{n,m-1}) \right] \\ &= \frac{1}{M_n} \sum_{m=1}^n \sum_{1 \leq i < j \leq m-1} \sum_{1 \leq k \leq m-1, k \notin \{i, j\}} \Omega_{ki}^* \Omega_{kj}^* \Omega_{mi}^* \Omega_{mj}^* \\ &= \frac{1}{M_n} \sum_{(m, i, j, k) \in CC(I_n)} \Omega_{mi}^* \Omega_{ik}^* \Omega_{kj}^* \Omega_{jm}^* = 1. \end{aligned} \quad (17)$$

This proves (17).

Consider (16). We first decompose the random variable  $\sum_{m=1}^n \mathbb{E}(X_{n,m}^2 | \mathcal{F}_{n,m-1})$  into the sum of two parts, and then calculate its variance. By (13),

$$Y_{(m-1)ij}^2 = \sum_k W_{ki}^2 W_{kj}^2 + \sum_{k \neq \ell} W_{ki} W_{kj} W_{\ell i} W_{\ell j},$$

where  $k$  and  $\ell$  range in  $\{1, 2, \dots, m-1\} \setminus \{i, j\}$ . Plugging it into (14), we have a decomposition

$$\sum_{m=1}^n \mathbb{E}(X_{n,m}^2 | \mathcal{F}_{n,m-1}) = I_a + I_b, \quad (18)$$

where

$$I_a = \frac{1}{M_n} \sum_{m=1}^n \sum_{i < j \leq m-1} \sum_{\substack{k \leq m-1 \\ k \notin \{i, j\}}} W_{ki}^2 W_{kj}^2 \Omega_{mi}^* \Omega_{mj}^*,$$

$$I_b = \frac{1}{M_n} \sum_{m=1}^n \sum_{i < j \leq m-1} \sum_{\substack{k, \ell \leq m-1 \\ k, \ell \notin \{i, j\}}} W_{ki} W_{kj} W_{\ell i} W_{\ell j} \Omega_{mi}^* \Omega_{mj}^*.$$

Then,

$$\begin{aligned} & \text{Var} \left( \sum_{m=1}^n \mathbb{E}(X_{n,m}^2 | \mathcal{F}_{n,m-1}) \right) \\ &= \text{Var}(I_a) + \text{Var}(I_b) + 2\text{Cov}(I_a, I_b) \\ &\leq \left( \sqrt{\text{Var}(I_a)} + \sqrt{\text{Var}(I_b)} \right)^2 \end{aligned} \quad (19)$$

It suffices to show that both  $\text{Var}(I_a) \rightarrow 0$  and  $\text{Var}(I_b) \rightarrow 0$ .

Consider the variance of  $I_a$ . In the sum of  $I_a$ , all 4-cycles  $(k, i, m, j)$  involved are selected in this way: We first select  $m$ , then select a pair  $(i, j)$  from  $\{1, 2, \dots, m-1\}$  and connect both  $i$  and  $j$  to  $m$ , and finally select  $k$  to close the cycle. In fact, these 4-cycles can be selected in an alternative way: First, select a V-shape  $(i, k, j)$  with  $k$  being the middle point. Second, select  $m > \max\{i, k, j\}$  to make the V-shape a cycle. Hence, we can rewrite

$$I_a = \frac{1}{M_n} \sum_{k=1}^n \sum_{\substack{1 \leq i < j \leq n \\ i \neq k, j \neq k}} W_{ki}^2 W_{kj}^2 \underbrace{\sum_{m > \max\{i, j, k\}} \Omega_{mi}^* \Omega_{mj}^*}_{\equiv b_{kij}}$$

The terms  $W_{ki}^2 W_{kj}^2$  corresponding to different  $k$  are independent of each other. We now fix  $k$  and calculate the covariance between  $W_{ki}^2 W_{kj}^2$  and  $W_{ki'}^2 W_{kj'}^2$  for  $(i, j) \neq (i', j')$ . There are three cases. Case (i):  $(i, j) = (i', j')$ . In this case,  $\text{Var}(W_{ki}^2 W_{kj}^2) \leq \mathbb{E}[W_{ki}^4 W_{kj}^4] \leq \mathbb{E}[W_{ki}^2 W_{kj}^2] \leq \Omega_{ki}^* \Omega_{kj}^*$ . Case (ii):  $i = i'$  but  $j \neq j'$ . In this case, we have  $\text{Cov}(W_{ki}^2 W_{kj}^2, W_{ki}^2 W_{kj'}^2) = \text{Var}(W_{ki}^2) \cdot \mathbb{E}[W_{kj}^2] \mathbb{E}[W_{kj'}^2] \leq \Omega_{ki}^* \Omega_{kj}^* \Omega_{kj'}^*$ . Case (iii):  $(i, j) \cap (i', j') = \emptyset$ . The two terms are independent, and their covariance is zero. Combining the above gives

$$\begin{aligned} \text{Var}(I_a) &\leq \frac{1}{M_n} \sum_{k=1}^n \left( \sum_{\substack{1 \leq i < j \leq n \\ i \neq k, j \neq k}} b_{kij}^2 \Omega_{ki}^* \Omega_{kj}^* \right. \\ &\quad \left. + \sum_{\substack{i, j, j' \in \{1, \dots, n\} \setminus \{k\} \\ i, j, j' \text{ are distinct}}} b_{kij} b_{kij'} \Omega_{ki}^* \Omega_{kj}^* \Omega_{kj'}^* \right). \end{aligned}$$

We now bound the right hand side. By condition (9),  $\Omega_{ij}^* \leq C\theta_i \theta_j$ . Hence,  $b_{kij} \leq C \sum_{m>k} \theta_m^2 \theta_i \theta_j \leq C \|\theta\|^2 \theta_i \theta_j$ . As a result,

$$\begin{aligned} \text{Var}(I_a) &\leq \frac{C}{M_n^2} \left[ \sum_{k, i, j} \|\theta\|^4 \theta_k^2 \theta_i^3 \theta_j^3 + \sum_{k, i, j, j'} \|\theta\|^4 \theta_k^3 \theta_i^3 \theta_j^2 \theta_{j'}^2 \right] \\ &\leq \frac{C}{M_n^2} (\|\theta\|^6 \|\theta\|_3^6 + \|\theta\|^8 \|\theta\|_3^6). \end{aligned}$$

By (7),  $\|\theta\| \rightarrow \infty$ , so the second term dominates. Moreover, since  $\Omega_{ij}^* = \Omega_{ij}(1 - \Omega_{ij}) \geq c\Omega_{ij}$  (in our setting, all  $\Omega_{ij}$ 's are bounded away from 1). As a result, we have  $M_n \geq c \sum_{C \subset (I_n)} \Omega_{i_1 i_2} \Omega_{i_2 i_3} \Omega_{i_3 i_4} \Omega_{i_4 i_1} \geq C^{-1} n^4 C_4$ . By Lemma B.1,  $n^4 C_4 \asymp \|\theta\|^8$ . Combining the above gives  $\text{Var} = O(\|\theta\|_3^6 / \|\theta\|^8)$ , i.e.,

$$\sqrt{\text{Var}(I_a)} \leq \frac{C \sum_i \theta_i^3}{(\sum_i \theta_i^2)^2} \leq \frac{C \theta_{\max}}{\sum_i \theta_i^2} = o(1). \quad (20)$$

Consider the variance of  $I_b$ . Rewrite

$$I_b = \frac{1}{M_n} \sum_{k, \ell, i, j \text{ are distinct}} c_{klij} G_{klij},$$

where

$$G_{klij} \equiv W_{ki} W_{kj} W_{\ell i} W_{\ell j}, \quad c_{klij} = \sum_{m>\max\{k, \ell, i, j\}} \Omega_{mi}^* \Omega_{mj}^*.$$

Since  $I_b$  has a mean zero,  $\text{Var}(I_b) = \mathbb{E}(I_b^2)$ . Additionally, for 2 cycles  $(k, \ell, i, j)$  and  $(k', \ell', i', j')$ , only when they are exactly equal, we have  $\mathbb{E}[G_{klij} G_{k'\ell' i' j'}] \neq 0$ . As a result,

$$\begin{aligned} \text{Var}(I_b) &= \frac{1}{M_n} \sum_{k, \ell, i, j \text{ are distinct}} c_{klij}^2 \mathbb{E}[G_{klij}^2] \\ &= \frac{1}{M_n} \sum_{k, \ell, i, j \text{ are distinct}} c_{klij}^2 \Omega_{ki}^* \Omega_{kj}^* \Omega_{\ell i}^* \Omega_{\ell j}^*. \end{aligned}$$

Similarly to how we get the bound for  $b_{kij}$ , we can derive that  $c_{klij} \leq C \|\theta\|^2 \theta_i \theta_j$ . Moreover,  $\Omega_{ki}^* \Omega_{kj}^* \Omega_{\ell i}^* \Omega_{\ell j}^* \leq C \theta_i^2 \theta_j^2 \theta_k^2 \theta_\ell^2$ . Hence,

$$\text{Var}(I_b) \leq \frac{C}{\|\theta\|^{16}} \sum_{k, \ell, i, j} \|\theta\|^4 \theta_k^2 \theta_\ell^2 \theta_i^4 \theta_j^4 \leq \frac{C \|\theta\|_4^8}{\|\theta\|^{16}}.$$

As a result,

$$\sqrt{\text{Var}(I_b)} \leq \frac{C \sum_i \theta_i^4}{(\sum_i \theta_i^2)^2} \leq \frac{C \theta_{\max}^2}{\sum_i \theta_i^2} = o(1). \quad (21)$$

Plugging (20)-(21) into (19) gives (16). Combining (15) and (16), we have proved (a).

We now check (b). By the Cauchy-Schwarz inequality and the Chebyshev's inequality,

$$\begin{aligned} &\sum_{m=1}^n \mathbb{E}(X_{n,m}^2 1_{\{|X_{n,m}| > \epsilon\}} | \mathcal{F}_{n,m-1}) \\ &\leq \sum_{m=1}^n \sqrt{\mathbb{E}(X_{n,m}^4 | \mathcal{F}_{n,m-1})} \sqrt{\mathbb{P}(|X_{n,m}| \geq \epsilon | \mathcal{F}_{n,m-1})} \\ &\leq \epsilon^{-2} \sum_{m=1}^n \mathbb{E}(X_{n,m}^4 | \mathcal{F}_{n,m-1}). \end{aligned}$$

Therefore, it suffices to show that the right hand side converges to zero in probability. Then, it suffices to show that its  $L^1$ -norm converges to zero. Since the right hand is a nonnegative random variable, we only need to prove that its expectation converges to zero, i.e.,

$$\mathbb{E} \left[ \sum_{m=1}^n X_{n,m}^4 \right] = o(1). \quad (22)$$

We now prove (22). We use the expression of  $X_{n,m}$  in (12). Conditioning on  $\mathcal{F}_{n,m-1}$ , the  $Y_{(m-1)ij}$ 's are non-random. It follows that

$$\begin{aligned} \mathbb{E}[X_{n,m}^4 | \mathcal{F}_{n,m-1}] &= \frac{1}{M_n^4} \sum_{\substack{i, j=1 \\ i \neq j}}^{m-1} Y_{(m-1)ij}^2 \mathbb{E}[W_{mi}^4 W_{mj}^4] \\ &+ \frac{1}{M_n^4} \sum_{i=1}^{m-1} \sum_{\substack{j, j'=1 \\ j, j' \neq i}}^{m-1} Y_{(m-1)ij} Y_{(m-1)ij'} \mathbb{E}[W_{mi}^4 W_{mj}^2 W_{mj'}^2] \\ &+ \frac{1}{M_n^4} \sum_{\substack{i, i', j, j'=1 \\ \text{distinct}}}^{m-1} Y_{(m-1)ij} Y_{(m-1)i'j'} \mathbb{E}[W_{mi}^2 W_{mj}^2 W_{mi'}^2 W_{mj'}^2]. \end{aligned}$$

First, we shall use the independence across entries of  $W$  and the fact that  $\mathbb{E}[W_{ij}^4] \leq \mathbb{E}[W_{ij}^2] \leq \Omega_{ij} \leq C\theta_i \theta_j$ . Second, in proving (17), we have seen that  $\mathbb{E}[Y_{(m-1)ij}^2] = \sum_{k < m, k \notin \{i, j\}} \Omega_{ki}^* \Omega_{kj}^* \leq C \sum_k \theta_k^2 \theta_i \theta_j \leq C \|\theta\|^2 \theta_i \theta_j$ .

Third, from (13), it is easy to see that when  $(i, j, i', j')$  are distinct,  $\mathbb{E}[Y_{(m-1)ij}Y_{(m-1)i'j'}] = 0$ ; moreover, for  $j \neq j'$ ,  $\mathbb{E}[Y_{(m-1)ij}Y_{(m-1)ij'}] = \sum_k \mathbb{E}[W_{ki}^2] \mathbb{E}[W_{kj}W_{kj'}] = 0$ . Last, in proving (20), we have seen that  $M_n \geq c\|\theta\|^8$ . Combining the above, we find that

$$\begin{aligned} \mathbb{E}[X_{n,m}^4] &= \frac{1}{M_n^2} \sum_{\substack{i,j=1 \\ i \neq j}}^{m-1} \mathbb{E}[Y_{(m-1)ij}^2] \mathbb{E}[W_{mi}^4 W_{mj}^4] \\ &\leq \frac{C}{\|\theta\|^{16}} \sum_{i,j=1}^{m-1} (\|\theta\|^2 \theta_i \theta_j) (\theta_m \theta_i) (\theta_m \theta_j) \\ &\leq C\theta_m^2 / \|\theta\|^{10}. \end{aligned}$$

As a result,

$$\sum_{n=1}^n \mathbb{E}[X_{n,m}^4] \leq C\|\theta\|^{-8} = o(1).$$

This gives (22) and (b) follows.  $\square$

### C. Proof of Theorem 3.3 and Corollary 3.1

Consider Theorem 3.3 first. For short, let

$$Z_n^{(m)} = \sqrt{\frac{B_{n,m}}{2m}} \widehat{C}_m^{-1/2} \widehat{\chi}_{gc}^{(m)}, \quad x_0^* = \mathbb{P}(Z_n^{(m)} \geq z_\alpha).$$

It suffices to show that under the null and alternative,

$$|x_0^* - \Phi(\delta_{gc}^{(m)} - z_\alpha)| \leq o(1). \quad (23)$$

Denote  $a_n = (C_m / \widehat{C}_m)^{1/2}$  for short. It is seen that

$$a_n \xrightarrow{P} 1, \quad (24)$$

and

$$\frac{1}{a_n} Z_n^{(m)} = \sqrt{\frac{B_{n,m}}{2m}} C_m^{-1/2} \widehat{\chi}_{gc}^{(m)}. \quad (25)$$

Combining Theorem 3.1 and the proof of Theorem 3.2, we have shown that

$$\sqrt{\frac{B_{n,m}}{2m}} C_m^{-1/2} [\widehat{\chi}_{gc}^{(m)} - \chi_{gc,0}^{(m)}] \xrightarrow{P} N(0, 1), \quad (26)$$

where by definitions,

$$\sqrt{\frac{B_{n,m}}{2m}} C_m^{-1/2} \chi_{gc,0}^{(m)} = \delta_{gc}^{(m)}. \quad (27)$$

Combining (25)-(27) gives

$$\frac{1}{a_n} Z_n^{(m)} - \delta_{gc}^{(m)} \xrightarrow{d} N(0, 1). \quad (28)$$

Denote the CDF of  $\frac{1}{a_n} Z_n^{(m)} - \delta_{gc}^{(m)}$  by  $F_n$ . Recall that  $\Phi$  denotes the CDF of  $N(0, 1)$ . It follows from (28) that

$$\sup_x |F_n(x) - \Phi(x)| \rightarrow 0. \quad (29)$$

We now rewrite

$$x_0^* = \mathbb{P}\left(\frac{1}{a_n} Z_n^{(m)} - \delta_{gc}^{(m)} \geq \frac{1}{a_n} z_\alpha - \delta_{gc}^{(m)}\right),$$

and introduce a proxy by

$$x_0 = \mathbb{P}\left(\frac{1}{a_n} Z_n^{(m)} - \delta_{gc}^{(m)} \geq z_\alpha - \delta_{gc}^{(m)}\right).$$

By triangle inequality,

$$|x_0^* - \Phi(\delta_{gc}^{(m)} - z_\alpha)| \leq |x_0^* - x_0| + |x_0 - \Phi(\delta_{gc}^{(m)} - z_\alpha)|. \quad (30)$$

where by (29),

$$|x_0 - \Phi(\delta_{gc}^{(m)} - z_\alpha)| \rightarrow 0. \quad (31)$$

Moreover, for any fixed  $\epsilon > 0$ , it is seen that

$$|x_0^* - x_0| \leq I + II,$$

where

$$I = \mathbb{P}(|a_n - 1| \geq \epsilon),$$

and

$$II = \mathbb{P}\left(\frac{1}{a_n} Z_n^{(m)} - \delta_{gc}^{(m)} \text{ falls between } (1 \pm \epsilon)z_\alpha - \delta_{gc}^{(m)}\right),$$

which by (29) does not exceed

$$\mathbb{P}(N(0, 1) \text{ falls between } (1 \pm \epsilon)z_\alpha - \delta_{gc}^{(m)}) + o(1);$$

note the first term does not exceed  $(2/\sqrt{2\pi})z_\alpha\epsilon$ . Combining these gives that for any  $\epsilon > 0$ ,

$$|x_0^* - \Phi(\delta_{gc}^{(m)} - z_\alpha)| \leq (2/\sqrt{2\pi})z_\alpha\epsilon + \mathbb{P}(|a_n - 1| \geq \epsilon) + o(1).$$

Recall that  $a_n \xrightarrow{P} 1$ , the claim follows.

Next, consider Corollary 3.1. It is seen that  $\delta_{gc}^{(m)} = 0$  under the null and that under the alternative,

$$\delta_{gc}^{(m)} \geq \sum_{k=2}^K \lambda_k^m / \left[ \sum_{k=1}^K \lambda_k^m \right]^{1/2}.$$

When  $m = 4$ , by Lemma 6.1,  $\delta_{gc}^{(4)} \geq c_4\|\theta\|^4$  for some constant  $c_4 > 0$ . When  $m = 3$  and  $P$  is positive definite,  $\lambda_k$  are the eigenvalues of  $\Theta\Pi P\Pi'\Theta$ , so for  $1 \leq k \leq K$ ,  $\lambda_k \geq 0$ . Using Lemma 6.1,  $\delta_{gc}^{(3)} \geq c_3\|\theta\|^3$  for some constant  $c_3$ . Combining these with Theorem 3.3 gives the claim.

## D. Proof of Secondary Lemmas

### D.1. Proof of Lemma 6.1

We first consider the claim about  $\lambda_k$ 's. Recall that  $\lambda_k$ 's are the eigenvalues of the matrix  $G^{1/2}PG^{1/2}$ . First, we

have  $\|G\| \leq \sum_{k,\ell} G(k,\ell) = \sum_{k,\ell} \sum_i \theta_i^2 \pi_i(k) \pi_i(\ell) = \sum_i \theta_i^2 \sum_{k,\ell} \pi_i(k) \pi_i(\ell) = \|\theta\|^2$ . Second, let  $g_k = \sum_{i \in \mathcal{N}_k} \theta_i^2$  for  $1 \leq k \leq K$ , and write  $\Theta = \Theta_1 + \Theta_2$ , where  $\Theta_1(i,i) = \theta_i \cdot 1\{i \in \cup_{k=1}^K \mathcal{N}_k\}$  and  $\Theta_2 \equiv \Theta - \Theta_1$ . It yields that  $G = \Pi' \Theta_1^2 \Pi + \Pi' \Theta_2^2 \Pi = \text{diag}(g_1, \dots, g_K) + \Pi' \Theta_2^2 \Pi$ . Hence,  $\lambda_{\min}(G) \geq \min_{1 \leq k \leq K} g_k \geq c_2 \|\theta\|^2$ , where the last inequality is from condition (8). Combining the above gives

$$c_2 \|\theta\|^2 \leq \lambda_{\min}(G) \leq \|\theta\|^2. \quad (32)$$

Using condition (9), we find that  $|\lambda_k| \leq \|PG\| \leq C\|G\| = O(\|\theta\|^2)$ . Additionally, since  $|\lambda_k|^2$  is an eigenvalue of  $(G^{1/2} P G^{1/2})^2 = G^{1/2} P G P G^{1/2}$ , we then have  $|\lambda_k|^2 \geq \lambda_{\min}(G) \cdot \lambda_{\min}(PGP) \geq \lambda_{\min}^2(G) \cdot s_{\min}^2(P) \geq c_1^2 c_2^2 \|\theta\|^4$ . It gives

$$C^{-1} \|\theta\|^2 \leq |\lambda_k| \leq C \|\theta\|^2, \quad 1 \leq k \leq K.$$

We then consider the claim about  $\eta$ . Since  $\max_k |\eta' \xi_k|^2$  is upper bounded by  $\sum_k |\eta' \xi_k|^2$  and lower bounded by  $K^{-1} \sum_k |\eta' \xi_k|^2$ , it suffices to show that

$$C^{-1} \|\theta\|_1^2 \leq \sum_{1 \leq k \leq K} |\eta' \xi_k|^2 \leq C \|\theta\|_1^2. \quad (33)$$

Since  $\xi_1, \dots, \xi_K$  form an orthonormal basis,

$$\sum_{1 \leq k \leq K} |\eta' \xi_k|^2 = \|\eta\|^2 = 1'_n \Theta \Pi G^{-1} \Pi' \Theta 1_n.$$

It follows from (32) that the right hand side has the same order as  $\|\theta\|^{-2} \|\Pi' \Theta 1_n\|^2$ . Write  $v = \Pi' \Theta 1_n$ . For  $1 \leq k \leq K$ ,  $v(k) = \sum_i \pi_i(k) \theta_i$ . It follows that  $v(k) \leq \|\theta\|_1$ . At the same time,  $\sum_{k=1}^K v^2(k) \geq \frac{(\sum_{k=1}^K v(k))^2}{K} = \frac{\|\theta\|_1^2}{K}$ , where we've used Cauchy-Schwarz inequality.

It follows that

$$C^{-1} \|\theta\|_1^2 \leq \|\Pi' \Theta 1_n\|^2 \leq C \|\theta\|_1^2.$$

Hence, (33) follows.  $\square$

## D.2. Proof of Lemma B.1

Consider the first item. By (16) of (Jin et al., 2018),

$$C_4 = \frac{1}{B_{n,4}} \left[ \sum_{k=1}^K \lambda_k^4 + O(\|\theta\|_4^4 \|\theta\|^4) \right],$$

where we note  $B_{n,4} \sim n^{-4}$ . First, by Lemma 6.1 of (Jin et al., 2018),

$$\sum_{k=1}^K \lambda_k^4 \asymp \|\theta\|^8,$$

Second, by (7) of (Jin et al., 2018),  $\theta_{\max} \leq \|\theta\|_3 \rightarrow 0$ , so it is seen  $\|\theta\|_4^4 \leq \theta_{\max} \|\theta\|_3^3 \leq o(1)$ , and so  $\|\theta\|_4^4 \|\theta\|^4 \leq o(\|\theta\|^4)$ . Combining these give the claim.

Consider the second item. By (17) of (Jin et al., 2018),

$$L_2 = \frac{1}{B_{n,3}} \left[ \sum_{k=1}^K \lambda_k^2(\eta, \xi_k)^2 + O(\|\theta\|_1^2 \|\theta\|_4^4 \|\theta\|^{-2}) \right],$$

where by Lemma 6.1 of (Jin et al., 2018),

$$\sum_{k=1}^K \lambda_k^2(\eta, \xi_k)^2 \asymp \|\theta\|^2 \|\theta\|_1^2.$$

By similar argument,  $\|\theta\|_1^2 \|\theta\|_4^4 \|\theta\|^{-2} \leq o(\|\theta\|^2 \|\theta\|_1^2)$ , so the claim follows by noting  $B_{n,3} \sim n^{-3}$ .

Consider the third item. By similar argument, it is seen that

$$\begin{aligned} L_3 &= \frac{1}{B_{n,4}} \left[ \sum_{k=1}^K \lambda_k^3(\eta, \xi_k)^2 + O(\|\theta\|_1^2 \|\theta\|_4^4) \right] \\ &\leq C n^{-4} \|\theta\|_1^2 \|\theta\|^4. \end{aligned}$$

For the lower bound, we use a different proof as  $\lambda_k$  may be negative. By  $L_3 = E[\widehat{L}_3]$  and  $E[A_{ij}] = \Omega_{ij}$  when  $i \neq j$ ,

$$L_3 = \frac{1}{B_{n,4}} \sum_{\substack{1 \leq i_1, i_2, i_3, i_4 \leq n \\ \text{are distinct}}} \Omega_{i_1 i_2} \Omega_{i_2 i_3} \Omega_{i_3 i_4}.$$

As before, let  $\mathcal{N}_1$  denote the set of pure nodes in community 1. It is not hard to see that

$$L_3 \geq \sum_{k=1}^K \sum_{\substack{i_1, i_2, i_3, i_4 \in \mathcal{N}_k \\ \text{are distinct}}} \Omega_{i_1 i_2} \Omega_{i_2 i_3} \Omega_{i_3 i_4}.$$

In our model, all diagonal entries of  $P$  are 1, so for any  $i, j \in \mathcal{N}_1$ ,  $\Omega_{ij} = \theta_i \theta_j$ . Therefore,

$$L_3 \geq \sum_{k=1}^K \sum_{\substack{i_1, i_2, i_3, i_4 \in \mathcal{N}_k \\ \text{are distinct}}} \theta_{i_1} \theta_{i_4} \theta_{i_2}^2 \theta_{i_3}^2. \quad (34)$$

Now, we can lower bound the right hand side of (34) by

$$I - II - III - IV,$$

where

$$I = \sum_{k=1}^K \sum_{i_1, i_2, i_3, i_4 \in \mathcal{N}_k} \theta_{i_1} \theta_{i_4} \theta_{i_2}^2 \theta_{i_3}^2,$$

$$II = \sum_{k=1}^K \sum_{\substack{i_1, i_2, i_3, i_4 \in \mathcal{N}_k \\ i_1 = i_4}} \theta_{i_1} \theta_{i_4} \theta_{i_2}^2 \theta_{i_3}^2,$$

$$III = \sum_{\substack{i_1, i_2, i_3, i_4 \in \mathcal{N}_1 \\ i_2 = i_3}} \theta_{i_1} \theta_{i_4} \theta_{i_2}^2 \theta_{i_3}^2,$$

and

$$IV = 4 \sum_{k=1}^K \sum_{\substack{i_1, i_2, i_3, i_4 \in \mathcal{N}_k \\ i_1 = i_2}} \theta_{i_1} \theta_{i_4} \theta_{i_2}^2 \theta_{i_3}^2.$$

First, by (8) of (Jin et al., 2018),

$$\begin{aligned} I &= \sum_{k=1}^K \left( \sum_{i \in \mathcal{N}_k} \theta_i \right)^2 \left( \sum_{i \in \mathcal{N}_k} \theta_i^2 \right)^2 \\ &\geq C \|\theta\|^4 \sum_{k=1}^K \left( \sum_{i \in \mathcal{N}_k} \theta_i \right)^2 \\ &\geq C \|\theta\|_1^2 \|\theta\|^4, \end{aligned}$$

where the last inequality is Cauchy-Schwarz inequality.

Second, by (7) of (Jin et al., 2018) that  $\theta_{\max} \leq \|\theta\|_3 = o(1)$ , we obtain  $\|\theta\|^2 \leq o(1) \cdot \|\theta\|_1$  (note  $\|\theta\| \rightarrow \infty$ ), and

$$\begin{aligned} II &\leq C \sum_{k=1}^K \sum_{i_1, i_2, i_3 \in \mathcal{N}_k} \theta_{i_1} \theta_{i_2}^2 \theta_{i_3}^2 \\ &\leq C \|\theta\|_1 \|\theta\|^4 \\ &= o(\|\theta\|_1^2 \|\theta\|^4). \end{aligned}$$

Similarly, we have  $\|\theta\|_3^3 \leq o(1) \cdot \|\theta\|_2^2$  and  $\|\theta\|_4^4 \leq o(1) \cdot \|\theta\|_2^2$ , which implies

$$III = o(\|\theta\|_1^2 \|\theta\|^4), \quad \text{and} \quad IV = o(\|\theta\|_1^2 \|\theta\|^4).$$

Combining these gives  $L_3 \geq c \|\theta\|_1^2 \|\theta\|^4$ , and the claim follows.

We now prove the next three items (on the variances). In the Proof of Lemma B.2, we've already shown that  $\frac{1}{B_{n,4}} \sum_{\text{distinct } i_1, \dots, i_4} G_{i_1 i_2 i_3 i_4}(W)$  is the dominating term of  $(\widehat{C}_4 - C_4)$ , and that

$$\begin{aligned} &\text{Var} \left( \frac{1}{B_{n,4}} \sum_{\substack{i_1, \dots, i_4 \\ \text{distinct}}} G_{i_1 i_2 i_3 i_4}(W) \right) \\ &\leq C n^{-4} \sum_{\substack{i_1, \dots, i_4 \\ \text{distinct}}} G_{i_1 i_2 i_3 i_4}(\Omega) \\ &\leq C n^{-4} \sum_{i_1, \dots, i_4} \theta_{i_1}^2 \theta_{i_2}^2 \theta_{i_3}^2 \theta_{i_4}^2 = C n^{-4} \|\theta\|^8. \end{aligned}$$

Combining it with  $C_4 \asymp n^{-4} \|\theta\|^8$ , we get  $\text{Var}(\widehat{C}_4) = O(n^{-4} C_4)$ .

Consider  $\text{Var}(\widehat{L}_2)$ . By definitions and that  $B_{n,m} \asymp n^m$ , we bound

$$\mathbb{E}(\widehat{L}_2 - L_2)^2 \leq C n^{-6} \mathbb{E} \left[ \sum_{i_1 < i_2 < i_3} (A_{i_1 i_2} A_{i_2 i_3} - \Omega_{i_1 i_2} \Omega_{i_2 i_3})^2 \right]. \quad (35)$$

Recall that when  $i \neq j$ ,  $A_{ij} = \Omega_{ij} + W_{ij}$ . Since for any numbers  $x, y, a, b$ ,  $(a+x)(b+y) - ab = xy + ay + bx$ , we can write

$$\sum_{i_1 < i_2 < i_3} (A_{i_1 i_2} A_{i_2 i_3} - \Omega_{i_1 i_2} \Omega_{i_2 i_3}) = I + II + III,$$

where

$$I = \sum_{i_1 < i_2 < i_3} W_{i_1 i_2} W_{i_2 i_3},$$

$$II = \sum_{i_1 < i_2 < i_3} \Omega_{i_1 i_2} W_{i_2 i_3},$$

and

$$III = \sum_{i_1 < i_2 < i_3} \Omega_{i_2 i_3} W_{i_1 i_2}.$$

Inserting this into (35) and using Cauchy-Schwarz inequality,

$$\mathbb{E}(\widehat{L}_2 - L_2)^2 \leq C n^{-6} (\mathbb{E}[I^2] + \mathbb{E}[II^2] + \mathbb{E}[III^2]).$$

It then suffices to show

$$\mathbb{E}[I^2] \lesssim \|\theta\|_1^3 \|\theta\|_3^3, \quad (36)$$

$$\mathbb{E}[II^2] \lesssim \|\theta\|_1^3 \|\theta\|_3^3, \quad (37)$$

and

$$\mathbb{E}[III^2] \lesssim \|\theta\|_1^3 \|\theta\|_3^3. \quad (38)$$

We now show (36)-(38) separately.

Consider (36). Note that for two sets of indices  $(i_1, i_2, i_3)$  and  $(j_1, j_2, j_3)$  such that  $i_1 < i_2 < i_3$ ,  $j_1 < j_2 < j_3$ , by basic statistics, we have that when  $(i_1, i_2, i_3) \neq (j_1, j_2, j_3)$ ,

$$\mathbb{E}[W_{i_1 i_2} W_{i_2 i_3} W_{j_1 j_2} W_{j_2 j_3}] = 0.$$

and when  $(i_1, i_2, i_3) = (j_1, j_2, j_3)$ ,

$$\begin{aligned} \mathbb{E}[W_{i_1 i_2} W_{i_2 i_3} W_{j_1 j_2} W_{j_2 j_3}] &= E[W_{i_1 i_2}^2 W_{i_2 i_3}^2] \\ &= \Omega_{i_1 i_2} (1 - \Omega_{i_1 i_2}) \Omega_{i_2 i_3} (1 - \Omega_{i_2 i_3}). \end{aligned}$$

Therefore,

$$\begin{aligned} \mathbb{E}[I^2] &= \sum_{i_1 < i_2 < i_3} \sum_{j_1 < j_2 < j_3} E[W_{i_1 i_2} W_{i_2 i_3} W_{j_1 j_2} W_{j_2 j_3}] \\ &\leq \sum_{i_1 < i_2 < i_3} \mathbb{E}[W_{i_1 i_2}^2 W_{i_2 i_3}^2] \\ &\leq \sum_{i_1 < i_2 < i_3} \Omega_{i_1 i_2} (1 - \Omega_{i_1 i_2}) \Omega_{i_2 i_3} (1 - \Omega_{i_2 i_3}). \end{aligned}$$

Recall that for any  $i < j$ ,

$$\Omega_{ij} (1 - \Omega_{ij}) \leq \Omega_{ij} \leq \theta_i \theta_j,$$

it follows that

$$\mathbb{E}[(I)^2] \leq \sum_{i_1 < i_2 < i_3} \theta_{i_1} \theta_{i_2} \theta_{i_2} \theta_{i_3} \leq \|\theta\|_1^2 \|\theta\|_2^2,$$

and the claim follows by Cauchy Schwarz inequality that  $\|\theta\|_1^2 \|\theta\|_2^2 \leq \|\theta\|_1^2 (\|\theta\|_1 \|\theta\|_3^2) = \|\theta\|_1^3 \|\theta\|_3^3$ .

Consider (37)-(38). Since the proofs are similar, we only show (37).

Note that for two sets of indices  $(i_1, i_2, i_3)$  and  $(j_1, j_2, j_3)$  such that  $i_1 < i_2 < i_3, j_1 < j_2 < j_3$ , by basic statistics, we have that when  $(i_2, i_3) \neq (j_2, j_3)$ ,

$$\mathbb{E}[W_{i_2 i_3} W_{j_2 j_3}] = 0.$$

and when  $(i_2, i_3) = (j_2, j_3)$ ,

$$\mathbb{E}[W_{i_2 i_3} W_{j_2 j_3}] = \mathbb{E}[W_{i_2 i_3}^2] = \Omega_{i_2 i_3} (1 - \Omega_{i_2 i_3}).$$

Therefore,

$$\begin{aligned} \mathbb{E}[(II)^2] &= \sum_{i_1 < i_2 < i_3} \sum_{j_1 < j_2 < j_3} \mathbb{E}[\Omega_{i_1 i_2} \Omega_{j_1 j_2} W_{i_2 i_3} W_{j_2 j_3}] \\ &= \sum_{i_1 < i_2 < i_3} \mathbb{E}[\Omega_{i_1 i_2} W_{i_2 i_3} \sum_{j_1 < j_2 < j_3} (\Omega_{j_1 j_2} W_{j_2 j_3})] \\ &= \sum_{i_1 < i_2 < i_3} \mathbb{E}[\Omega_{i_1 i_2} W_{i_2 i_3}^2 (\sum_{j_1 < i_2} \Omega_{j_1 i_2})] \\ &= \sum_{i_1 < i_2 < i_3} \mathbb{E}[\Omega_{i_1 i_2} \Omega_{i_2 i_3} (1 - \Omega_{i_2 i_3}) (\sum_{j_1 < i_2} \Omega_{j_1 i_2})] \end{aligned}$$

Again by  $\Omega_{ij}(1 - \Omega_{ij}) \leq \Omega_{ij} \leq \theta_i \theta_j$  for any  $i < j$ , we find

$$\begin{aligned} \mathbb{E}[(II)^2] &\leq \sum_{i_1 < i_2 < i_3} \mathbb{E}[\Omega_{i_1 i_2} \Omega_{i_2 i_3} (\sum_{j_1 < i_2} \Omega_{j_1 i_2})] \\ &\leq \sum_{i_1 < i_2 < i_3} \theta_{i_1} \theta_{i_2}^2 \theta_{i_3} (\sum_{j_1 < i_2} \theta_{j_1} \theta_{i_2}) \\ &\leq \|\theta\|_1^3 \|\theta\|_3^3. \end{aligned}$$

Last, we prove the claim on  $\text{Var}(\widehat{L}_3)$ . It suffices to control the covariance between  $(A_{i_1 i_2} A_{i_2 i_3} A_{i_3 i_4})$  and  $(A_{j_1 j_2} A_{j_2 j_3} A_{j_3 j_4})$ . To be more specific, define the set

$$\mathcal{J} = \{(i_1, i_2), (i_2, i_3), (i_3, i_4), (j_1, j_2), (j_2, j_3), (j_3, j_4)\},$$

whose elements are pairs of unordered integers, i.e. we treat  $(i_1, i_2)$  and  $(i_2, i_1)$  as the same element.

Let  $|\mathcal{J}|$  be the number of distinct elements of  $\mathcal{J}$ , where  $3 \leq |\mathcal{J}| \leq 6$  under the condition that  $i_1 < i_2 < i_3 < i_4$  and  $j_1 < j_2 < j_3 < j_4$ . To control the variance of  $\widehat{L}_3$ , it suffices to bound the following quantity

$$\sum_{s=3}^6 \sum_{|\mathcal{J}|=s} \text{Cov}(A_{i_1 i_2} A_{i_2 i_3} A_{i_3 i_4}, A_{j_1 j_2} A_{j_2 j_3} A_{j_3 j_4}).$$

Furthermore, it suffices to show for  $3 \leq s \leq 6$ ,

$$\sum_{|\mathcal{J}|=s} \text{Cov}(A_{i_1 i_2} A_{i_2 i_3} A_{i_3 i_4}, A_{j_1 j_2} A_{j_2 j_3} A_{j_3 j_4}) \lesssim \|\theta\|_1^4 \|\theta\|_3^6. \quad (39)$$

When  $|\mathcal{J}| = 6$ , it's not hard to see  $(A_{i_1 i_2} A_{i_2 i_3} A_{i_3 i_4})$  and  $(A_{j_1 j_2} A_{j_2 j_3} A_{j_3 j_4})$  are independent because the six elements in  $\mathcal{J}$  are all distinct, which indicates

$$\sum_{|\mathcal{J}|=6} \text{Cov}(A_{i_1 i_2} A_{i_2 i_3} A_{i_3 i_4}, A_{j_1 j_2} A_{j_2 j_3} A_{j_3 j_4}) = 0.$$

The following basic property is frequently used in the discussion of remaining cases. For non-negative random variables  $X$  and  $Y$ , we have

$$\text{Cov}(X, Y) \leq \mathbb{E}[XY]. \quad (40)$$

Consider the case where  $|\mathcal{J}| = 5$ . By symmetry, it's enough to consider three situations where  $(i_1, i_2) = (j_1, j_2)$ ,  $(i_1, i_2) = (j_2, j_3)$  and  $(i_2, i_3) = (j_2, j_3)$ , separately.

If  $(i_1, i_2) = (j_1, j_2)$ , we have

$$\begin{aligned} &\sum_{(i_1, i_2) = (j_1, j_2)} \text{Cov}(A_{i_1 i_2} A_{i_2 i_3} A_{i_3 i_4}, A_{j_1 j_2} A_{j_2 j_3} A_{j_3 j_4}) \\ &\leq \sum_{(i_1, i_2) = (j_1, j_2)} \mathbb{E}[A_{i_1 i_2} A_{i_2 i_3} A_{i_3 i_4} A_{j_2 j_3} A_{j_3 j_4}] \\ &\leq C \sum_{(i_1, i_2) = (j_1, j_2)} \theta_{i_1} \theta_{i_2}^2 \theta_{i_3}^2 \theta_{i_4} \theta_{j_2} \theta_{j_3}^2 \theta_{j_4} \\ &\leq C \sum \theta_{i_1} \theta_{i_2}^3 \theta_{i_3}^2 \theta_{i_4} \theta_{j_3}^2 \theta_{j_4} \\ &= C \|\theta\|_1^3 \|\theta\|_4 \|\theta\|_3^3 \leq C \|\theta\|_1^4 \|\theta\|_3^6, \end{aligned}$$

where the last inequality is due to  $\|\theta\|_4 \leq \|\theta\|_1 \|\theta\|_3^3$  by Cauchy-Schwarz inequality.

If  $(i_1, i_2) = (j_2, j_3)$ , we have

$$\begin{aligned} &\sum_{(i_1, i_2) = (j_2, j_3)} \text{Cov}(A_{i_1 i_2} A_{i_2 i_3} A_{i_3 i_4}, A_{j_1 j_2} A_{j_2 j_3} A_{j_3 j_4}) \\ &\leq \sum_{(i_1, i_2) = (j_2, j_3)} \mathbb{E}[A_{i_1 i_2} A_{i_2 i_3} A_{i_3 i_4} A_{j_1 j_2} A_{j_3 j_4}] \\ &\leq C \sum_{(i_1, i_2) = (j_2, j_3)} \theta_{i_1} \theta_{i_2}^2 \theta_{i_3}^2 \theta_{i_4} \theta_{j_1} \theta_{j_2} \theta_{j_3} \theta_{j_4} \\ &= C \sum_{i_1, \dots, i_4, j_1, j_4} \theta_{i_1}^2 \theta_{i_2}^3 \theta_{i_3}^2 \theta_{i_4} \theta_{j_1} \theta_{j_4} \\ &= C \|\theta\|_1^3 \|\theta\|_4 \|\theta\|_3^3 \leq C \|\theta\|_1^4 \|\theta\|_3^6, \end{aligned}$$

where the last inequality is due to  $\|\theta\|_4 \leq \|\theta\|_1 \|\theta\|_3^3$ .

If  $(i_2, i_3) = (j_2, j_3)$ , we have

$$\begin{aligned}
 & \sum_{(i_2, i_3)=(j_2, j_3)} \text{Cov}(A_{i_1 i_2} A_{i_2 i_3} A_{i_3 i_4}, A_{j_1 j_2} A_{j_2 j_3} A_{j_3 j_4}) \\
 & \leq \sum_{(i_2, i_3)=(j_2, j_3)} \mathbb{E}[A_{i_1 i_2} A_{i_2 i_3} A_{i_3 i_4} A_{j_1 j_2} A_{j_3 j_4}] \\
 & \leq C \sum_{(i_2, i_3)=(j_2, j_3)} \theta_{i_1} \theta_{i_2}^2 \theta_{i_3}^2 \theta_{i_4} \theta_{j_1} \theta_{j_2} \theta_{j_3} \theta_{j_4} \\
 & = C \sum_{i_1, \dots, i_4, j_1, j_4} \theta_{i_1} \theta_{i_2}^2 \theta_{i_3}^2 \theta_{i_4} \theta_{j_1} \theta_{j_4} = C \|\theta\|_1^4 \|\theta\|_3^6.
 \end{aligned}$$

Combining above three inequalities, we derive

$$\sum_{|\mathcal{J}|=5} \text{Cov}(A_{i_1 i_2} A_{i_2 i_3} A_{i_3 i_4}, A_{j_1 j_2} A_{j_2 j_3} A_{j_3 j_4}) \leq C \|\theta\|_1^4 \|\theta\|_3^6.$$

Consider the case where  $|\mathcal{J}| = 4$ . By symmetry,  $\mathcal{J}$  either equals to  $\mathcal{J}_1 = \{(i_1, i_2), (i_2, i_3), (i_3, i_4), (j_1, j_2)\}$  or  $\mathcal{J}_2 = \{(i_1, i_2), (i_2, i_3), (i_3, i_4), (j_2, j_3)\}$ .

Therefore, we decompose and bound

$$\begin{aligned}
 & \sum_{|\mathcal{J}|=4} \text{Cov}(A_{i_1 i_2} A_{i_2 i_3} A_{i_3 i_4}, A_{j_1 j_2} A_{j_2 j_3} A_{j_3 j_4}) \\
 & \lesssim \sum_{\mathcal{J}_1} \text{Cov}(A_{i_1 i_2} A_{i_2 i_3} A_{i_3 i_4}, A_{j_1 j_2} A_{j_2 j_3} A_{j_3 j_4}) \\
 & \quad + \sum_{\mathcal{J}_2} \text{Cov}(A_{i_1 i_2} A_{i_2 i_3} A_{i_3 i_4}, A_{j_1 j_2} A_{j_2 j_3} A_{j_3 j_4}) \\
 & \leq \sum_{\mathcal{J}_1} \mathbb{E}[A_{i_1 i_2} A_{i_2 i_3} A_{i_3 i_4} A_{j_1 j_2}] + \sum_{\mathcal{J}_2} \mathbb{E}[A_{i_1 i_2} A_{i_2 i_3} A_{i_3 i_4} A_{j_2 j_3}]
 \end{aligned}$$

It then suffices to show

$$\sum_{\mathcal{J}_1} \mathbb{E}[A_{i_1 i_2} A_{i_2 i_3} A_{i_3 i_4} A_{j_1 j_2}] \leq C \|\theta\|_1^4 \|\theta\|_3^6, \quad (41)$$

and

$$\sum_{\mathcal{J}_2} \mathbb{E}[A_{i_1 i_2} A_{i_2 i_3} A_{i_3 i_4} A_{j_2 j_3}] \leq C \|\theta\|_1^4 \|\theta\|_3^6, \quad (42)$$

For (41),  $j_2$  must equal to one of  $i_1, \dots, i_4$  since  $(j_2, j_3)$  equals to some  $(i_s, i_{s+1})$  by definition of  $\mathcal{J}_1$ . By symmetry, we only need to consider  $j_2 = i_1$  and  $j_2 = i_2$ . Again by  $\Omega_{ij} \leq \theta_i \theta_j$ , we obtain

$$\begin{aligned}
 & \sum_{\mathcal{J}_1} \mathbb{E}[A_{i_1 i_2} A_{i_2 i_3} A_{i_3 i_4} A_{j_1 j_2}] \\
 & \leq \sum_{j_2=i_1} \theta_{i_1} \theta_{i_2}^2 \theta_{i_3}^2 \theta_{i_4} \theta_{j_1} \theta_{j_2} + \sum_{j_2=i_2} \theta_{i_1} \theta_{i_2}^2 \theta_{i_3}^2 \theta_{i_4} \theta_{j_1} \theta_{j_2} \\
 & \leq \sum_{j_2=i_1} \theta_{i_1}^2 \theta_{i_2}^2 \theta_{i_3}^2 \theta_{i_4} \theta_{j_1} + \sum_{j_2=i_2} \theta_{i_1} \theta_{i_2}^3 \theta_{i_3}^2 \theta_{i_4} \theta_{j_1} \\
 & = \|\theta\|_1^2 \|\theta\|_3^6 + C \|\theta\|_1^3 \|\theta\|^2 \|\theta\|_3^3 \\
 & \leq \|\theta\|_1^4 \|\theta\|_3^6.
 \end{aligned}$$

Here we explain the last inequality. By Cauchy-Schwartz inequality,  $\|\theta\|^4 \leq \|\theta\|_1 \|\theta\|_3^3$ . Combining with (7) that  $\|\theta\| \rightarrow \infty$ ,  $\|\theta\|_1^2 \|\theta\|^6 \lesssim \|\theta\|_1^2 \|\theta\|^8 \leq \|\theta\|_1^4 \|\theta\|_3^6$ . Moreover,  $\|\theta\|_1^3 \|\theta\|^2 \|\theta\|_3^3 \leq \|\theta\|_1^3 \|\theta\|_3^3 (\|\theta\|^4) \leq \|\theta\|_1^4 \|\theta\|_3^6$ .

For (42), we similarly found  $j_2, j_3$  must equal to some  $i_1, \dots, i_4$ . By (7),  $\theta_{j_3} \leq C$ . Thus we only need to discuss the cases where  $j_2 = i_1$  or  $j_2 = i_2$ .

$$\begin{aligned}
 & \sum_{\mathcal{J}_2} \mathbb{E}[A_{i_1 i_2} A_{i_2 i_3} A_{i_3 i_4} A_{j_2 j_3}] \\
 & \leq \sum_{j_2=i_1} \theta_{i_1} \theta_{i_2}^2 \theta_{i_3}^2 \theta_{i_4} \theta_{j_2} + \sum_{j_2=i_2} \theta_{i_1} \theta_{i_2}^2 \theta_{i_3}^2 \theta_{i_4} \theta_{j_2} \\
 & \leq \sum_{j_2=i_1} \theta_{i_1}^2 \theta_{i_2}^2 \theta_{i_3}^2 \theta_{i_4} \theta_{j_2} + \sum_{j_2=i_2} \theta_{i_1} \theta_{i_2}^3 \theta_{i_3}^2 \theta_{i_4} \theta_{j_2} \\
 & = C \|\theta\|_1^2 \|\theta\|^6 + C \|\theta\|_1^3 \|\theta\|^2 \|\theta\|_3^3 \leq C \|\theta\|_1^4 \|\theta\|_3^6,
 \end{aligned}$$

where the last inequality has been explained in the proof of (41).

Combining (41) and (42), we bound

$$\sum_{|\mathcal{J}|=4} \text{Cov}(A_{i_1 i_2} A_{i_2 i_3} A_{i_3 i_4}, A_{j_1 j_2} A_{j_2 j_3} A_{j_3 j_4}) \leq C \|\theta\|_1^4 \|\theta\|_3^6.$$

Finally, consider the case where  $|\mathcal{J}| = 3$ . In this case, the covariance is in fact variance. Therefore,

$$\begin{aligned}
 & \sum_{|\mathcal{J}|=3} \text{Cov}(A_{i_1 i_2} A_{i_2 i_3} A_{i_3 i_4}, A_{j_1 j_2} A_{j_2 j_3} A_{j_3 j_4}) \\
 & = \sum_{i_1, \dots, i_4} \text{Var}(A_{i_1 i_2} A_{i_2 i_3} A_{i_3 i_4}) \\
 & \leq \sum_{i_1, \dots, i_4} \mathbb{E}[A_{i_1 i_2} A_{i_2 i_3} A_{i_3 i_4}] \\
 & \leq \sum_{i_1, \dots, i_4} \theta_{i_1} \theta_{i_2}^2 \theta_{i_3}^2 \theta_{i_4} \\
 & = C \|\theta\|_1^2 \|\theta\|^2 \lesssim C \|\theta\|_1^2 \|\theta\|^6 \leq C \|\theta\|_1^4 \|\theta\|_3^6,
 \end{aligned}$$

where the second last inequality is by (7) that  $\|\theta\| \rightarrow \infty$  and last inequality is Cauchy-Schwarz inequality.

This proves (39).  $\square$

### D.3. Proof of Lemma B.2

Write for short  $T_n = \frac{\sqrt{B_{n,4}}}{\sqrt{C_4}} (\widehat{C}_4 - C_4)$ . We introduce some useful notations. For any  $n \times n$  matrix  $M$  and distinct indices  $(i_1, i_2, i_3, i_4)$ , define

$$\begin{aligned}
 G_{i_1 i_2 i_3 i_4}(M) &= M_{i_1 i_2} M_{i_2 i_3} M_{i_3 i_4} M_{i_4 i_1}, \\
 G(M) &= \sum_{(i_1, i_2, i_3, i_4) \in CC(I_n)} G_{i_1 i_2 i_3 i_4}(M).
 \end{aligned}$$

Additionally, let  $W = A - \Omega$  and let  $\Omega^*$  be the matrix where  $\Omega_{ij}^* = \Omega_{ij}(1 - \Omega_{ij})$  for all  $1 \leq i, j \leq n$ . We now rewrite

$$T_n = \frac{G(A) - G(\Omega)}{\sqrt{G(\Omega)}}, \quad S_{n,n} = \frac{G(W)}{\sqrt{G(\Omega^*)}}. \quad (43)$$

Therefore,

$$T_n - S_{n,n} = \frac{G(A) - G(\Omega) - G(W)}{\sqrt{G(\Omega)}} + S_{n,n} \left[ \frac{\sqrt{G(\Omega^*)}}{\sqrt{G(\Omega)}} - 1 \right] \\ \equiv J_1 + S_{n,n} \cdot J_2.$$

In the proof of Theorem 3.2, we have shown  $S_{n,n} \xrightarrow{d} N(0, 1)$ . Hence, to show  $(T_n - S_{n,n}) \xrightarrow{p} 0$ , it suffices to show that

$$J_1 \xrightarrow{p} 0 \quad (44)$$

and

$$J_2 \rightarrow 0. \quad (45)$$

First, we prove (44). We can decompose  $G_{i_1 i_2 i_3 i_4}(A) - G_{i_1 i_2 i_3 i_4}(\Omega) - G_{i_1 i_2 i_3 i_4}(W)$  as the sum of three terms

$$\begin{aligned} \Delta_{i_1 i_2 i_3 i_4}^{(1)} &= W_{i_1 i_2} \Omega_{i_2 i_3} \Omega_{i_3 i_4} \Omega_{i_4 i_1} + \Omega_{i_1 i_2} W_{i_2 i_3} \Omega_{i_3 i_4} \Omega_{i_4 i_1} \\ &\quad + \Omega_{i_1 i_2} \Omega_{i_2 i_3} W_{i_3 i_4} \Omega_{i_4 i_1} + \Omega_{i_1 i_2} \Omega_{i_2 i_3} \Omega_{i_3 i_4} W_{i_4 i_1}, \\ \Delta_{i_1 i_2 i_3 i_4}^{(2)} &= W_{i_1 i_2} W_{i_2 i_3} \Omega_{i_3 i_4} \Omega_{i_4 i_1} + W_{i_1 i_2} \Omega_{i_2 i_3} W_{i_3 i_4} \Omega_{i_4 i_1} \\ &\quad + W_{i_1 i_2} \Omega_{i_2 i_3} \Omega_{i_3 i_4} W_{i_4 i_1} + \Omega_{i_1 i_2} W_{i_2 i_3} W_{i_3 i_4} \Omega_{i_4 i_1} \\ &\quad + \Omega_{i_1 i_2} W_{i_2 i_3} \Omega_{i_3 i_4} W_{i_4 i_1} + \Omega_{i_1 i_2} \Omega_{i_2 i_3} W_{i_3 i_4} W_{i_4 i_1}, \\ \Delta_{i_1 i_2 i_3 i_4}^{(3)} &= \Omega_{i_1 i_2} W_{i_2 i_3} W_{i_3 i_4} W_{i_4 i_1} + W_{i_1 i_2} \Omega_{i_2 i_3} W_{i_3 i_4} W_{i_4 i_1} \\ &\quad + W_{i_1 i_2} W_{i_2 i_3} \Omega_{i_3 i_4} W_{i_4 i_1} + W_{i_1 i_2} W_{i_2 i_3} W_{i_3 i_4} \Omega_{i_4 i_1}. \end{aligned}$$

It is easy to see that

$$\mathbb{E} \left[ \sum_{CC(I_n)} \Delta_{i_1 i_2 i_3 i_4}^{(1)} \right] = 0. \quad (46)$$

We then study the variance of this term. Note that the four terms in  $\Delta_{i_1 i_2 i_3 i_4}^{(1)}$  are independent of each other. Let  $(j, s, m, \ell)$  be any cycle on the four nodes  $\{i_1, i_2, i_3, i_4\}$ . Then, the variance of  $W_{js} \Omega_{sm} \Omega_{m\ell} \Omega_{\ell j}$  is bounded by  $\Omega_{js} \Omega_{sm}^2 \Omega_{m\ell}^2 \Omega_{\ell j}^2 = O(\theta_j^3 \theta_s^3 \theta_m^4 \theta_\ell^4)$ . Hence,

$$\begin{aligned} \sum_{CC(I_n)} \text{Var}(\Delta_{i_1 i_2 i_3 i_4}^{(1)}) &\leq C \sum_{j,s,m,\ell} \theta_j^3 \theta_s^3 \theta_m^4 \theta_\ell^4 \\ &\leq C \|\theta\|_3^6 \|\theta\|_4^8 = o(\|\theta\|_3^6 \|\theta\|_4^8), \end{aligned}$$

where the last inequality is from the condition (7) and the fact that  $\|\theta\|_4^4 = (\sum_i \theta_i^4) \leq \theta_{\max}^2 (\sum_i \theta_i^2) = O(\|\theta\|^2) = o(\|\theta\|^4)$ . We then look at the covariance between  $\Delta_{i_1 i_2 i_3 i_4}^{(1)}$  and  $\Delta_{i'_1 i'_2 i'_3 i'_4}^{(1)}$ . Let  $(j, s, m, \ell)$  be any cycle on the four nodes  $\{i_1, i_2, i_3, i_4\}$ , and let  $(j', s', m', \ell')$  be any cycle on the four nodes  $\{i'_1, i'_2, i'_3, i'_4\}$ . As long as  $\{j, s\} \neq \{j', s'\}$ , the two terms  $W_{js} \Omega_{sm} \Omega_{m\ell} \Omega_{\ell j}$  and  $W_{j's'} \Omega_{s'm'} \Omega_{m'\ell'} \Omega_{\ell'j'}$  are independent, hence, their covariance is zero. If  $\{j, s\} = \{j', s'\}$ , their covariance is bounded by  $\Omega_{js}$ .

$\Omega_{sm} \Omega_{m\ell} \Omega_{\ell j} \Omega_{s'm'} \Omega_{m'\ell'} \Omega_{\ell'j} = O(\theta_j^3 \theta_s^3 \theta_m^2 \theta_\ell^2 \theta_{m'}^2 \theta_{\ell'}^2)$ . As a result,

$$\begin{aligned} &\sum_{CC(I_n) \times CC(I_n)} \text{Cov}(\Delta_{i_1 i_2 i_3 i_4}^{(1)}, \Delta_{i'_1 i'_2 i'_3 i'_4}^{(1)}) \\ &\leq C \sum_{j,s,m,\ell,m',\ell'} \theta_j^3 \theta_s^3 \theta_m^2 \theta_\ell^2 \theta_{m'}^2 \theta_{\ell'}^2 \leq C \|\theta\|_3^6 \|\theta\|_8^8. \end{aligned}$$

Note that  $G(\Omega) \asymp n^4 C_4 \asymp \|\theta\|^8$  by Lemma B.1. Additionally, from the condition (7),  $\|\theta\|_3 = o(1)$ . Hence, the above imply

$$\text{Var} \left( \sum_{CC(I_n)} \Delta_{i_1 i_2 i_3 i_4}^{(1)} \right) \ll G(\Omega). \quad (47)$$

Combining (46)-(47) gives

$$\frac{1}{\sqrt{G(\Omega)}} \sum_{CC(I_n)} \Delta_{i_1 i_2 i_3 i_4}^{(1)} \xrightarrow{p} 0. \quad (48)$$

We can consider other terms similarly. By direct calculations,

$$\begin{aligned} \text{Var} \left( \sum_{CC(I_n)} \Delta_{i_1 i_2 i_3 i_4}^{(2)} \right) &\leq \sum_{j,s,m,\ell} \Omega_{js} \Omega_{sm} \Omega_{m\ell}^2 \Omega_{\ell j}^2 \\ &\quad + \sum_{\substack{j,s,m \\ \ell,\ell'}} \Omega_{js} \Omega_{sm} \Omega_{m\ell} \Omega_{m,\ell'} \Omega_{\ell j} \Omega_{\ell'j} \\ &\leq C \sum_{j,s,m,\ell} \theta_j^3 \theta_s^2 \theta_m^3 \theta_\ell^4 + C \sum_{\substack{j,s,m \\ \ell,\ell'}} \theta_j^3 \theta_s^2 \theta_m^3 \theta_\ell^2 \theta_{\ell'}^2 \\ &\leq C \|\theta\|_3^6 \|\theta\|^2 \|\theta\|_4^4 + C \|\theta\|_3^6 \|\theta\|^6 = o(\|\theta\|^8), \end{aligned}$$

and

$$\begin{aligned} \text{Var} \left( \sum_{CC(I_n)} \Delta_{i_1 i_2 i_3 i_4}^{(3)} \right) &\leq \sum_{j,s,m,\ell} \Omega_{js}^2 \Omega_{sm} \Omega_{m\ell} \Omega_{\ell j} \\ &\leq C \sum_{j,s,m,\ell} \theta_j^3 \theta_s^3 \theta_m^2 \theta_\ell^2 \\ &\leq C \|\theta\|_3^6 \|\theta\|^4 = o(\|\theta\|^8). \end{aligned}$$

Hence, for the terms related to  $\Delta_{i_1 i_2 i_3 i_4}^{(2)}$  and  $\Delta_{i_1 i_2 i_3 i_4}^{(3)}$ , we also have a similar convergence as that of (48). These together imply  $J_1 \xrightarrow{p} 0$ . Hence, (44) is true.

Next, we prove (45). It is seen that

$$\begin{aligned} 0 \leq G(\Omega) - G(\Omega^*) &\leq C \sum_{j,s,m,\ell} \Omega_{js}^2 \Omega_{sm} \Omega_{m\ell} \Omega_{\ell j} \\ &\leq C \sum_{j,s,m,\ell} \theta_j^3 \theta_s^3 \theta_m^2 \theta_\ell^2 \leq C \|\theta\|_3^6 \|\theta\|^4 = o(\|\theta\|^8). \end{aligned}$$

As a result,  $|G(\Omega^*)/G(\Omega) - 1| = o(1)$ . This proves (45).  $\square$

#### D.4. Proof of Proposition A.1

The last item follows once the first three items are proved, so we only consider the first three items.

Consider the first item. Write

$$1'A^21 = \sum_{1 \leq i_1, i_2, i_3 \leq n} A_{i_1 i_2} A_{i_2 i_3}.$$

Recall that all diagonal entries of  $A$  are 0, we can exclude the case  $i_1 = i_2$  or  $i_2 = i_3$  from the summation. Therefore, we only need to sum over either the cases where  $i_1, i_2, i_3$  are distinct and the cases  $i_1 = i_3$  but  $i_1 \neq i_2$ . It follows

$$1'A^21 = \left( \sum_{\substack{i_1, i_2, i_3 \\ \text{are distinct}}} + \sum_{\substack{i_1, i_2, i_3 \\ i_1 = i_3, i_1 \neq i_2}} \right) A_{i_1 i_2} A_{i_2 i_3} = I + II.$$

Now, first, by definition,

$$I = B_{n,3} \widehat{L}_2, \quad \text{where } B_{n,3} = 6 \binom{n}{3},$$

and second (recall all diagonal entries of  $A$  are 0),

$$II = \sum_{i_1, i_2} A_{i_1 i_2}^2 = \text{tr}(A^2).$$

Combining these gives

$$\widehat{L}_2 = \frac{1}{6 \binom{n}{3}} (1'A^21 - \text{tr}(A^2)),$$

and the claim follows.

Consider the second item. Using similar arguments, we decompose

$$1'A^31 = \sum_{1 \leq i_1, i_2, i_3, i_4 \leq n} A_{i_1 i_2} A_{i_2 i_3} A_{i_3 i_4} = I + II + III + IV,$$

where

$$I = \sum_{\substack{i_1, i_2, i_3, i_4 \\ \text{are distinct}}} A_{i_1 i_2} A_{i_2 i_3} A_{i_3 i_4} = B_{n,4} \widehat{L}_3,$$

with  $B_{n,4} = 24 \binom{n}{4}$ ,

$$II = \left( \sum_{\substack{i_1, i_2, i_3, i_4 \\ i_1 = i_3}} + \sum_{\substack{i_1, i_2, i_3, i_4 \\ i_2 = i_4}} \right) A_{i_1 i_2} A_{i_2 i_3} A_{i_3 i_4} = 2 \cdot (1'A^21),$$

$$III = \sum_{\substack{i_1, i_2, i_3, i_4 \\ i_1 = i_4}} A_{i_1 i_2} A_{i_2 i_3} A_{i_3 i_4} = 1'A^31,$$

and

$$IV = - \sum_{\substack{i_1, i_2, i_3, i_4 \\ i_1 = i_3, i_2 = i_4}} A_{i_1 i_2} A_{i_2 i_3} A_{i_3 i_4} = -1'A1.$$

Combining these gives

$$\widehat{L}_3 = \frac{1}{24 \binom{n}{4}} [1'A^31 - 2 \cdot 1'A^21 + 1'A1 - \text{tr}(A^3)],$$

and the claim follows.

Consider the third item. Note first

$$\text{tr}(A^4) = \sum_{1 \leq i_1, i_2, i_3, i_4 \leq n} A_{i_1 i_2} A_{i_2 i_3} A_{i_3 i_4} A_{i_4 i_1}.$$

Similarly, we have

$$\text{tr}(A^4) = \sum_{i_1, i_2, i_3, i_4} A_{i_1 i_2} A_{i_2 i_3} A_{i_3 i_4} A_{i_4 i_1} = I + II + III,$$

where

$$I = \sum_{\substack{i_1, i_2, i_3, i_4 \\ \text{are distinct}}} A_{i_1 i_2} A_{i_2 i_3} A_{i_3 i_4} A_{i_4 i_1} = 24 \binom{n}{4} \widehat{C}_4,$$

$$II = \left( \sum_{\substack{i_1, i_2, i_3, i_4 \\ i_1 = i_3}} + \sum_{\substack{i_1, i_2, i_3, i_4 \\ i_2 = i_4}} \right) A_{i_1 i_2} A_{i_2 i_3} A_{i_3 i_4} A_{i_4 i_1} = 2 \cdot (1'A^21)$$

and

$$III = - \sum_{\substack{i_1, i_2, i_3, i_4 \\ i_1 = i_3, i_2 = i_4}} A_{i_1 i_2} A_{i_2 i_3} A_{i_3 i_4} A_{i_4 i_1} = -1'A1.$$

Combining these gives

$$\widehat{C}_4 = \frac{1}{24 \binom{n}{4}} \left( \text{tr}(A^4) - 2 \cdot 1'A^21 + 1'A1 \right),$$

and the claim follows.  $\square$

#### References

- Hall, Peter and Heyde, Christopher C. *Martingale limit theory and its application*. Academic press, 2014.
- Jin, Jiashun, Ke, Zheng Tracy, and Luo, Shengming. Network global testing by counting graphlets. *Manuscript*, 2018.
